# Supplementary material for: Epigenetic Regulation in Primary CNS Tumors: An Opportunity to Bridge Old and New WHO Classifications
Source: MDPI journal article supplement (doi:10.3390/cancers15092511), 2023-04-27
Supplement: s1 [file s1]

## SUPPLEMENTAL FIGURES

| Primary CNS Tumors by WHO Classification Diagnosis                     | WHO Grade(s) | SWI/SNF Mutation(s)     | Pathways Interacting with SWI/SNF      | Human ERV(s) Expressed                     | Non-Human ERV(s) Expressed | References         |
|------------------------------------------------------------------------|--------------|-------------------------|----------------------------------------|--------------------------------------------|----------------------------|--------------------|
| <b>Gliomas, glioneuronal tumors, and neuronal tumors</b>               |              |                         |                                        |                                            |                            |                    |
| <i>Adult-type diffuse gliomas</i>                                      |              |                         |                                        |                                            |                            |                    |
| Astrocytoma, IDH-mutant                                                | 2-4          | SMARCE1, SMARCA4, ATRX  | TP53, MYC, RB1                         | -                                          | -                          | [5,21–26,84]       |
| Oligodendroglioma, IDH-mutant and 1p/19q-codeleted                     | 2-3          | BICRA (GLTSCR1); ARID1A | SETD2, MYC; RB1                        | -                                          | -                          | [5,22,27,85–87]    |
| Glioblastoma, IDH-wildtype                                             | 4            | ATRX                    | EZH1P, SETD2; TP53; MYC; RB1           | HERV1, HERVK, HERVL, ERV3, HML-6 (ERVK3-1) | -                          | [5,28,29,78,79,88] |
| <i>Pediatric-type diffuse low-grade gliomas</i>                        |              |                         |                                        |                                            |                            |                    |
| Diffuse astrocytoma, MYB- or MYBL1-altered                             | 1            | -                       | -                                      | -                                          | -                          |                    |
| Angiocentric glioma                                                    | 1            | -                       | -                                      | -                                          | -                          |                    |
| Polymorphous low-grade neuroepithelial tumour of the young             | 1            | -                       | TP53/RB1 <sup>1</sup>                  | -                                          | -                          | [5,89]             |
| Diffuse low-grade glioma, MAPK pathway-altered                         | 1            | -                       | -                                      | -                                          | -                          |                    |
| <i>Pediatric-type diffuse high-grade gliomas</i>                       |              |                         |                                        |                                            |                            |                    |
| Diffuse midline glioma, H3 K27-altered                                 | 4            | SMARCA4; ATRX           | EZH1P, H3K27; TP53                     | -                                          | -                          | [5,30,31,90,91]    |
| Diffuse hemispheric glioma, H3 G34-mutant                              | 4            | ATRX                    | H3G34; TP53; MYCN                      | -                                          | -                          | [5,32–34,92]       |
| Diffuse pediatric-type high-grade glioma, H3-wildtype and IDH-wildtype | 4            | -                       | TP53, MYCN                             | -                                          | -                          | [5,93]             |
| Infant-type hemispheric glioma                                         | NR           | -                       | -                                      | -                                          | -                          |                    |
| <i>Circumscribed astrocytic gliomas</i>                                |              |                         |                                        |                                            |                            |                    |
| Pilocytic astrocytoma                                                  | 1            | ATRX <sup>2</sup>       | -                                      | -                                          | -                          | [35]               |
| High-grade astrocytoma with piloid features                            | 3-4          | ATRX                    | -                                      | -                                          | -                          | [35]               |
| Pleomorphic xanthroastrocytoma                                         | 2-3          | SMARCB1, ARID1A, ATRX   | TP53 <sup>2</sup> , NOTCH <sup>2</sup> | -                                          | -                          | [5,36–38]          |
| Subependymal giant cell astrocytoma                                    | 1            | -                       | -                                      | -                                          | -                          |                    |
| Chordoid glioma                                                        | 2            | -                       | -                                      | -                                          | -                          |                    |

|                                                                                      |     |                   |                   |   |   |           |
|--------------------------------------------------------------------------------------|-----|-------------------|-------------------|---|---|-----------|
| Astroblastoma, MN1-altered                                                           | NR  | -                 | MN1               | - | - | [94]      |
| <i>Glioneuronal and neuronal tumors</i>                                              |     |                   |                   |   |   |           |
| Ganglioglioma                                                                        | 1   | -                 | -                 | - | - |           |
| Gangliocytoma                                                                        | 1   | -                 | -                 | - | - |           |
| Desmoplastic infantile ganglioglioma/desmoplastic infantile astrocytoma              | 1   | ATRX <sup>1</sup> | TP53 <sup>1</sup> | - | - | [5,39–42] |
| Dysembryoplastic neuroepithelial tumor                                               | 1   | -                 | -                 | - | - |           |
| Diffuse glioneuronal tumor with oligodendroglioma-like features and nuclear clusters | NR  | -                 | -                 | - | - |           |
| Papillary glioneuronal tumor                                                         | 1   | -                 | -                 | - | - |           |
| Rosette-forming glioneuronal tumor                                                   | 1   | -                 | -                 | - | - |           |
| Myxoid glioneuronal tumor                                                            | 1   | -                 | -                 | - | - |           |
| Diffuse leptomeningeal glioneuronal tumor                                            | NR  | -                 | -                 | - | - |           |
| Multinodular and vacuolating neuronal tumor                                          | 1   | -                 | -                 | - | - |           |
| Dysplastic cerebellar gangliocytoma (Lhermitte-Duclos disease)                       | 1   | -                 | -                 | - | - |           |
| Central neurocytoma                                                                  | 2   | -                 | MYCN              | - | - | [5,95]    |
| Extraventricular neurocytoma                                                         | 2   | -                 | -                 | - | - |           |
| Cerebellar liponeurocytoma                                                           | 2   | -                 | TP53              | - | - | [5,96]    |
| <i>Ependymal tumors</i>                                                              |     |                   |                   |   |   |           |
| Supratentorial ependymoma (fusion-negative)                                          | 2-3 | -                 | -                 | - | - |           |
| Supratentorial ependymoma, ZFTA fusion-positive                                      | 2-3 | -                 | ZFTA-RELA         | - | - | [97]      |
| Supratentorial ependymoma, YAP1 fusion-positive                                      | 2-3 | -                 | YAP1              | - | - | [98]      |
| Posterior fossa ependymoma                                                           | 2-3 | -                 | EZH1P             | - | - | [99]      |
| Posterior fossa group A (PFA) ependymoma                                             | 2-3 | -                 | EZH1P             | - | - | [99]      |
| Posterior fossa group B (PFB) ependymoma                                             | 2-3 | -                 | -                 | - | - |           |
| Spinal ependymoma                                                                    | 2-3 | -                 | -                 | - | - |           |

|                                                          |     |                                 |                                     |        |                    |                   |
|----------------------------------------------------------|-----|---------------------------------|-------------------------------------|--------|--------------------|-------------------|
| Spinal ependymoma, MYCN-amplified                        | 2-3 | -                               | MYCN                                | -      | -                  | [5,100–103]       |
| Myxopapillary ependymoma                                 | 2   | -                               | -                                   | -      | -                  |                   |
| Subependymoma                                            | 1   | -                               | -                                   | -      | -                  |                   |
| <b>Choroid plexus tumors</b>                             |     |                                 |                                     |        |                    |                   |
| Choroid plexus papilloma                                 | 1   | -                               | TP53 (rare)                         | -      | Roux Sarcoma Virus | [5,72,104]        |
| Atypical choroid plexus papilloma                        | 2   | -                               | -                                   | -      | -                  |                   |
| Choroid plexus carcinoma                                 | 3   | -                               | TP53; SHH, NOTCH                    | -      | -                  | [5,104–106]       |
| <b>Embryonal tumors</b>                                  |     |                                 |                                     |        |                    |                   |
| <i>Medulloblastoma</i>                                   |     |                                 |                                     |        |                    |                   |
| Medulloblastoma, WNT-activated                           | 4   | SMARCA4, SMARCB1, ARID1A, ARID2 | WNT/CTNNB1, TP53, OCT4              | -      | -                  | [5,43,107]        |
| Medulloblastoma, SHH-activated and TP53-wildtype         | 4   | -                               | SHH, CREBBP; MYCN, MYCL, YAP1, OCT4 | -      | -                  | [5,43,44,107,109] |
| Medulloblastoma, SHH-activated and TP53-mutant           | 4   | -                               | TP53, SHH, CREBBP, OCT4             | -      | -                  | [5,44,107,109]    |
| Medulloblastoma, non-WNT/non-SHH (Group 3/4)             | 4   | SMARCA4                         | MYC                                 | -      | -                  | [5,107,109,110]   |
| Medulloblastoma, histologically defined                  | 4   | Not relevant                    | Not relevant                        | -      | -                  |                   |
| <i>Other CNS embryonal tumors</i>                        |     |                                 |                                     |        |                    |                   |
| Atypical teratoid/rhabdoid tumor                         | 4   | SMARCB1, SMARCA4                | SHH, NRAS, MYC                      | HERV-K | -                  | [5,10,45–50]      |
| Cribriform neuroepithelial tumor                         | NR  | SMARCB1                         | -                                   | -      | -                  | [51]              |
| Embryonal tumor with multilayered rosettes               | 4   | -                               | LIN28A; TP53                        | -      | -                  | [5,111]           |
| CNS neuroblastoma, FOXR2-activated                       | 4   | -                               | -                                   | -      | -                  |                   |
| CNS tumor with BCOR internal tandem duplication          | NR  | SMARCA2                         | -                                   | -      | -                  | [52]              |
| CNS embryonal tumor NEC/NOS                              | 3-4 | -                               | -                                   | -      | -                  |                   |
| <b>Pineal tumors</b>                                     |     |                                 |                                     |        |                    |                   |
| Pineocytoma                                              | 1   | -                               | -                                   | -      | -                  |                   |
| Pineal parenchymal tumor of intermediate differentiation | 2-3 | -                               | -                                   | -      | -                  |                   |



|                                                           |     |         |               |                       |                              |              |
|-----------------------------------------------------------|-----|---------|---------------|-----------------------|------------------------------|--------------|
| Solitary fibrous tumor                                    | 1-3 | -       | EP300; TP53   | -                     | -                            | [120–122]    |
| Soft tissue tumors: Vascular tumors                       |     |         |               |                       |                              |              |
| Hemangiomas and vascular malformations                    | NR  | -       | -             | -                     | ALV                          | [75]         |
| Hemangioblastoma                                          | 1   | -       | -             | -                     | -                            |              |
| Soft tissue tumors: Skeletal muscle tumors                |     |         |               |                       |                              |              |
| Rhabdomyosarcoma                                          | NR  | -       | -             | ERV-9                 | Feline endogenous retrovirus | [77]         |
| Soft tissue tumors: Tumors of uncertain differentiation   |     |         |               |                       |                              |              |
| Intracranial mesenchymal tumor, FET::CREB fusion-positive | NR  | -       | FET           | -                     | -                            | [123]        |
| CIC-rearranged sarcoma                                    | 4   | -       | NUTM1         | -                     | -                            | [5]          |
| Primary intracranial sarcoma, DICER1-mutant               | NR  | ATRX    | DICER1; TP53  | -                     | -                            | [68,112]     |
| Ewing sarcoma                                             | 4   | -       | FET; TP53     | Syncytin-1; ERV-L     | -                            | [80,123–126] |
| Chondro-osseous tumors: Chondrogenic tumors               |     |         |               |                       |                              |              |
| Mesenchymal chondrosarcoma                                | NR  | -       | NOTCH, NCoA-2 | -                     | -                            | [127]        |
| Chondrosarcoma                                            | 1-3 | -       | RB1, H3K36    | -                     | -                            | [128-130]    |
| Notochordal tumors                                        |     |         |               |                       |                              |              |
| Chordoma                                                  | NR  | SMARCB1 | -             | -                     | -                            | [69,70]      |
| Melanocytic tumors                                        |     |         |               |                       |                              |              |
| Diffuse meningeal melanocytic neoplasms                   |     |         |               |                       |                              |              |
| Melanocytosis and melanomatosis                           | NR  | -       | YAP1          | -                     | -                            | [131]        |
| Circumscribed meningeal melanocytic neoplasms             |     |         |               |                       |                              |              |
| Melanocytoma and melanoma                                 | NR  | -       | YAP1          | -                     | MMVL30                       | [81,131]     |
| Hematolymphoid tumors involving the CNS                   |     |         |               |                       |                              |              |
| Lymphomas: CNS lymphomas                                  |     |         |               |                       |                              |              |
| Primary diffuse large B-cell lymphoma of the CNS          | NR  | -       | MYC           | Variety - Unspecified | -                            | [82,132]     |
| Immunodeficiency-associated CNS lymphomas                 | NR  | -       | -             | -                     | -                            |              |
| Lymphomatoid granulomatosis                               | 1-3 | -       | -             | -                     | -                            |              |
| Intravascular large B-cell lymphoma                       | NR  | -       | -             | -                     | -                            |              |
| Lymphomas: Miscellaneous rare lymphomas in the CNS        |     |         |               |                       |                              |              |

|                                             |    |         |                           |        |                                                                                                                                            |              |
|---------------------------------------------|----|---------|---------------------------|--------|--------------------------------------------------------------------------------------------------------------------------------------------|--------------|
| MALT lymphoma of the dura                   | NR | -       | NOTCH                     | -      | -                                                                                                                                          | [5]          |
| Other low-grade B-cell lymphomas of the CNS | NR | -       | -                         | -      | -                                                                                                                                          |              |
| Anaplastic large cell lymphoma (ALK+/ALK-)  | NR | -       | -                         | -      | -                                                                                                                                          |              |
| T-cell and NK/T-cell lymphomas              | NR | -       | -                         | -      | -                                                                                                                                          |              |
| <i>Histiocytic tumors</i>                   |    |         |                           |        |                                                                                                                                            |              |
| Erdheim-Chester disease                     | NR | -       | NRAS                      | -      | -                                                                                                                                          | [133]        |
| Rosai-Dorfman disease                       | NR | -       | -                         | -      | -                                                                                                                                          |              |
| Juvenile xanthogranuloma                    | NR | -       | -                         | -      | -                                                                                                                                          |              |
| Langerhans cell histiocytosis               | NR | -       | -                         | -      | primate type D retroviruses, murine intracisternal A particles, Jaagsiekte sheep retrovirus, and murine long interspersed nuclear elements | [73]         |
| Histiocytic sarcoma                         | NR | -       | -                         | -      | -                                                                                                                                          |              |
| <b>Germ cell tumors</b>                     |    |         |                           |        |                                                                                                                                            |              |
| Mature teratoma                             | NR | -       | JMJD1C; RB1               | ERVK24 | -                                                                                                                                          | [83,134,135] |
| Immature teratoma                           | NR | SMARCA4 | JMJD1C; RB1               | -      | -                                                                                                                                          | [71,134,135] |
| Teratoma with somatic-type malignancy       | NR | -       | JMJD1C                    | -      | -                                                                                                                                          | [134]        |
| Germinoma                                   | NR | -       | JMJD1C, LIN28A; TP53; RB1 | ERVK24 | -                                                                                                                                          | [83,134–136] |
| Embryonal carcinoma                         | NR | -       | JMJD1C, LIN28A; RB1       | ERVK24 | -                                                                                                                                          | [83,134,135] |
| Yolk sac tumor                              | NR | -       | JMJD1C, LIN28A; TP53; RB1 | ERVK24 | -                                                                                                                                          | [83,134-136] |
| Choriocarcinoma                             | NR | -       | JMJD1C; RB1               | ERVK24 | -                                                                                                                                          | [83,134,135] |
| Mixed germ cell tumor <sup>3</sup>          | NR | -       | JMJD1C; RB1               | -      | -                                                                                                                                          | [134,135]    |
| <b>Tumors of the sellar region</b>          |    |         |                           |        |                                                                                                                                            |              |
| Adamantinomatous craniopharyngioma          | 1  | -       | SHH, CTNNB1 (B-catenin)   | -      | -                                                                                                                                          | [137]        |
| Papillary craniopharyngioma                 | 1  | -       | -                         | -      | -                                                                                                                                          |              |

|                                                                                |    |   |                             |   |   |           |
|--------------------------------------------------------------------------------|----|---|-----------------------------|---|---|-----------|
| Pituicytoma, Granular cell tumor of the sellar region, Spindle cell oncocytoma | NR | - | -                           | - | - |           |
| Pituitary adenoma/pituitary neuroendocrine tumor                               | NR | - | Ik1, Ik2; TP53 <sup>5</sup> | - | - | [138,139] |
| Pituitary blastoma                                                             | NR | - | DICER1; TP53                | - | - | [140,141] |

**Supplemental Table S1.** Database of primary central nervous system (CNS) tumors outlined by the 5<sup>th</sup> edition of the World Health Organization (WHO) classification scheme and stratified by tumor category, assigned WHO grade, known epigenetic and/or genetic mutations of interest, and documented aberrant endogenous retrovirus (ERV) expression. Abbreviations: ALK (Anaplastic lymphoma kinase); ALV (Avian leukosis virus); ARID1A (AT-Rich Interaction Domain 1A); ARID1B (AT-Rich Interaction Domain 1B); ARID2 (AT-Rich Interaction Domain 2); ATRX (Alpha-thalassemia/mental retardation, X-linked); BCOR (BCL6 Corepressor); BICRA (BRD4 Interacting Chromatin Remodeling Complex Associated Protein); CIC (Capicua transcriptional repressor); CREBBP (cAMP-response element binding protein); CTNNB1 (Catenin beta-1); EED (Embryonic Ectoderm Development); EP300 (E1A-associated protein p300); ERV (Endogenous retrovirus); ERV3 (Endogenous retrovirus group 3); ERV9 (Endogenous retrovirus group 9); ERVK24 (Endogenous retrovirus group K member 24); ERVK3-1 (Endogenous retrovirus group 3 member 1); EZHIP (Enhancer of Zeste Homologs Inhibitory Protein); FOXR2 (Forkhead Box R2); GLTSCR1 (Glioma tumor suppressor candidate region gene 1); H3K27 (Histone 3 on lysine 27); H3K36 (Histone 3 on lysine 36); H3G34 (Histone 3 on arginine 34); HERV1 (Human endogenous retrovirus group 1); HERVK (Human endogenous retrovirus group K); HERVL (Human endogenous retrovirus group L); HML-6 (Human endogenous MMTV-like 6); IDH (Isocitrate dehydrogenase); Ik1 (Ikaros 1); Ik2 (Ikaros 2); JMJD1C (Jumonji domain containing 1C); KLF4 (Kruppel-like factor 4); LIN28A (Lin-28 homolog A); MALT (Mucosa associated lymphoid tissue); MAPK (Mitogen-activated protein kinase); MMVL30 (Mouse murine leukemia virus group L member 30); MN1 (Meningioma (disrupted in balanced translocation) 1); MYBL1 (MYB proto-oncogene like 1); NCoA-2 (Nuclear receptor coactivator 2); NEC (Not elsewhere classified); NK (Natural Killer); NOS (Not otherwise specified); NOTCH (Neurogenic locus notch homolog protein); NR (Not Reported); NRAS (Neuroblastoma ras viral oncogene homolog); NUTM1 (NUT midline carcinoma family member 1); OCT4 (Octamer-binding transcription 4); PBRM1 (Polybromo-1); RB1 (Retinoblastoma Transcriptional Corepressor 1); RELA (V-rel reticuloendotheliosis viral oncogene homolog A); SETD2 (SET domain-containing 2); SHH (Sonic Hedgehog); SMARCA2 (SWI/SNF Related Matrix Associated, Actin Dependent Regulator of Chromatin Subfamily A, Member 2); ; SMARCA4 (SWI/SNF Related Matrix Associated, Actin Dependent Regulator of Chromatin Subfamily A, Member 4); SMARCB1 (SWI/SNF Related Matrix Associated, Actin Dependent Regulator of Chromatin Subfamily B, Member 1); SMARCE1 (SWI/SNF Related Matrix Associated, Actin Dependent Regulator of Chromatin Subfamily E, Member 1); SUZ12 (Zeste 12 homolog); SWI/SNF (SWItch/Sucrose Non-Fermentable); TP53 (Tumor protein 53); WNT (Wingless-related integration site); YAP1 (Yes-associated protein-1); ZFTA (Zinc finger translocation associated)

<sup>1</sup>reported in one recurrent case with glioblastoma-like histology

<sup>2</sup>reported in rare tumors with anaplastic features

<sup>3</sup>dependent on composition of tumor-subtypes contained within primary tumor

<sup>4</sup>reported in meningiomas without concomitant Merlin mutation

<sup>5</sup>reported only in pituitary carcinomas

| Primary CNS Tumors by WHO Classification Diagnosis       | WHO Grade(s) | Pathways Interacting with SWI/SNF | Human ERV(s) Expressed                    | Non-Human ERV(s) Expressed | References       |
|----------------------------------------------------------|--------------|-----------------------------------|-------------------------------------------|----------------------------|------------------|
| <b>Gliomas, glioneuronal tumors, and neuronal tumors</b> |              |                                   |                                           |                            |                  |
| <i>Adult-type diffuse gliomas</i>                        |              |                                   |                                           |                            |                  |
| Glioblastoma, IDH-wildtype                               | 4            | EZH1P, SETD2; TP53; MYC; RB1      | HERV1, HERVK, HERVL, ERV3, HML-6 (ERV3-1) | -                          | [28,29,78,79,88] |
| <b>Choroid plexus tumors</b>                             |              |                                   |                                           |                            |                  |

|                                                                 |     |                           |                       |                    |                 |
|-----------------------------------------------------------------|-----|---------------------------|-----------------------|--------------------|-----------------|
| Choroid plexus papilloma                                        | 1   | TP53 (rare)               | -                     | Roux Sarcoma Virus | [5,104–106]     |
| <b>Embryonal tumors</b>                                         |     |                           |                       |                    |                 |
| <i>Other CNS embryonal tumors</i>                               |     |                           |                       |                    |                 |
| Atypical teratoid/rhabdoid tumor                                | 4   | SHH, NRAS, MYC            | HERV-K                | -                  | [5,10,45–50]    |
| <b>Cranial and paraspinal nerve tumors</b>                      |     |                           |                       |                    |                 |
| Malignant peripheral nerve sheath tumor                         | NR  | SUZ12, EED, H3K27; TP53   | -                     | ALV                | [61–66,115–117] |
| <b>Meningioma</b>                                               |     |                           |                       |                    |                 |
| Secretory meningioma                                            | 1-3 | KLF4                      | HERV-K <sup>4</sup>   | -                  | [59,118]        |
| Atypical meningioma                                             | 2-3 | TP53                      | HERV-K <sup>4</sup>   | -                  | [59,119]        |
| Anaplastic (malignant) meningioma                               | 3   | H3K27M; TP53              | HERV-K <sup>4</sup>   | -                  | [5,59,119]      |
| <b>Mesenchymal, non-meningothelial tumors involving the CNS</b> |     |                           |                       |                    |                 |
| <i>Soft tissue tumors: Tumors of uncertain differentiation</i>  |     |                           |                       |                    |                 |
| Ewing sarcoma                                                   | 4   | FET; TP53                 | Syncytin-1; ERV-L     | -                  | [80,123–126]    |
| <b>Melanocytic tumors</b>                                       |     |                           |                       |                    |                 |
| <i>Circumscribed meningeal melanocytic neoplasms</i>            |     |                           |                       |                    |                 |
| Melanocytoma and melanoma                                       | NR  | YAP1                      | -                     | MMVL30             | [81,131]        |
| <b>Hematolymphoid tumors involving the CNS</b>                  |     |                           |                       |                    |                 |
| <i>Lymphomas: CNS lymphomas</i>                                 |     |                           |                       |                    |                 |
| Primary diffuse large B-cell lymphoma of the CNS                | NR  | MYC                       | Variety - Unspecified | -                  | [82,132]        |
| <b>Germ cell tumors</b>                                         |     |                           |                       |                    |                 |
| Mature teratoma                                                 | NR  | JMJD1C; RB1               | ERV-K24               | -                  | [83,134,135]    |
| Germinoma                                                       | NR  | JMJD1C, LIN28A; TP53; RB1 | ERV-K24               | -                  | [83,134–136]    |
| Embryonal carcinoma                                             | NR  | JMJD1C, LIN28A; RB1       | ERV-K24               | -                  | [83,134,135]    |
| Yolk sac tumor                                                  | NR  | JMJD1C, LIN28A; TP53; RB1 | ERV-K24               | -                  | [83,134–136]    |
| Choriocarcinoma                                                 | NR  | JMJD1C; RB1               | ERV-K24               | -                  | [83,134,135]    |

**Supplemental Table S2.** Primary CNS tumors with known genetic and/or epigenetic altered pathways with direct interaction with SWI/SNF subunits and aberrant ERV expression implicated in their tumorigenesis.
